# Supplementary material for: Comparative Serum Analyses Identify Cytokines and Hormones Commonly Dysregulated as Well as Implicated in Promoting Osteolysis in MMP-2-Deficient Mice and Children
Source: Front Physiol. 2020 Sep 25;11:568718. doi: 10.3389/fphys.2020.568718 (PMC7546215; doi:10.3389/fphys.2020.568718)
Supplement: Supplementary file 2 [file Table_2.XLSX]

## Sheet: Sheet1
	MONA Patient 1 (Female)				MONA Patient 2 (Female)				MONA Patient 3 (Female)	MONA Patient 4 (female)	MONA Patient 5 (Male)				Unaffected 1 (Female)				Unaffected 2 (Male)	Unaffected 3 (Female)	Unaffected 4 (Female)	Unaffected 5 (Female)	Unaffected 6 (Female)
	pg/ml				pg/ml				pg/ml	pg/ml	pg/ml				pg/ml				pg/ml	pg/ml	pg/ml	pg/ml	pg/ml
Analyte	Replicate 1	Replicate 2	mean	SEM	Replicate 1	Replicate 2	mean	SEM	Replicate 1	Replicate 1	Replicate 1	Replicate 2	mean	SEM	Replicate 1	Replicate 2	mean	SEM	Replicate 1	Replicate 1	Replicate 1	Replicate 1	Replicate 1
sCD40L	1526.38	1665.42	1595.9	49.1581	5997.4	6068.65	6033.02	25.1907	2671.37	159.76	106.33	118.09	112.21	4.15779	106.33	116.42	111.375	3.56735	1511.76	5155.16	4377.99	4925.13	437.45
EGF	23.68	23.37	23.525	0.109602	100.28	100.46	100.37	0.0636396	98.02	1500.69	12.49	12.97	12.73	0.169706	165.16	175.4	170.28	3.62039	211.67	194.93	76.46	318.27	558.51
Eotaxin	31.58	32.29	31.935	0.251023	77.8	80.51	79.155	0.95813	77.04	17.84	31.98	32.86	32.42	0.311127	6.08	4.84	5.46	0.438406	15.32	23.48	28.52	34.25	10.35
FGF-2	68.32	70.98	69.65	0.940452	83.99	90.31	87.15	2.23446	68.32	117.07	62.07	58.41	60.24	1.29401	81.02	79.2	80.11	0.643467	48.04	117.07	53	105.25	255.02
FLT-3L	24.63	25.69	25.16	0.374767	20.74	21.8	21.27	0.374767	5.54	12.4	17.43	18.69	18.06	0.445477	19.13	17.34	18.235	0.632861	15.04	22.96	18.15	26.3	18.33
Fractalkine	102.14	108.61	105.375	2.28749	79.91	86.06	82.985	2.17435	84.85	22.65	93.14	95.44	94.29	0.813173	124.91	124.91	124.91	0	116.92	184.36	82.4	117.93	6.4
G-CSF	0.38	2.57	1.475	0.774282	0.99	0.38	0.685	0.215668	0.38	0.38	0.99	0.38	0.685	0.215668	0.38	0.38	0.38	0	1.8	6.23	25.8	6.44	0.38
GM-CSF	19.34	18.06	18.7	0.452548	12.79	14	13.395	0.4278	7.31	16.17	26.6	29.33	27.965	0.965201	18.69	13.7	16.195	1.76423	13.7	52.51	12.49	37.05	14.92
GROa	26.3	26.36	26.33	0.0212132	48.59	45.86	47.225	0.965201	17.35	25.23	32.04	35.23	33.635	1.12784	17.93	17.38	17.655	0.194454	25.48	27.78	13.15	33.97	6.85
IFN-a2	72.1	82.3	77.2	3.60624	28.01	39.3	33.655	3.99162	74.71	39.3	120.51	123.6	122.055	1.09248	23.75	19.1	21.425	1.64402	46.03	46.03	31.97	35.73	150.89
IFNy	1.59	1.79	1.69	0.0707107	0.07	0.01	0.04	0.0212132	0.76	0.39	0.39	0.49	0.44	0.0353553	0.63	0.52	0.575	0.0388909	1.59	2.51	0.44	1.59	2.2
IL-1a	36.71	34.79	35.75	0.678823	12.69	15.81	14.25	1.10309	69.35	27.15	18.94	28.1	23.52	3.23855	33.51	32.87	33.19	0.226274	24.3	57.33	6.54	50.85	27.78
IL-1b	18.53	24.47	21.5	2.10011	12.06	16.27	14.165	1.48846	58.22	11.68	38.75	46.71	42.73	2.81428	16.84	19.65	18.245	0.993485	9.92	38.21	8.15	29.22	83.71
IL-1RA	9.85	11.13	10.49	0.452548	45.27	50.26	47.765	1.76423	29.4	7.65	10.47	10.33	10.4	0.0494975	7.48	7.65	7.565	0.0601041	4.94	17.58	4.03	19.19	35.16
IL-2	2.14	1.69	1.915	0.159099	0.07	0.21	0.14	0.0494975	0.84	0.11	1.64	1.31	1.475	0.116673	0.31	0.35	0.33	0.0141421	0.33	2.14	0.33	0.87	6.95
IL-3	1.06	1.01	1.035	0.0176777	0.03	0.13	0.08	0.0353553	0.03	0.23	0.23	0.13	0.18	0.0353553	0.13	0.03	0.08	0.0353553	0.03	0.03	0.13	0.03	0.03
IL-4	1.11	1.05	1.08	0.0212132	0.65	0.41	0.53	0.0848528	0.31	0.76	1.36	1.73	1.545	0.130815	1.39	1.42	1.405	0.0106066	1.97	0.83	2.31	0.51	0.8
IL-5	4.58	4.7	4.64	0.0424264	0.82	0.76	0.79	0.0212132	0.71	3.42	7.52	6.76	7.14	0.268701	0.76	0.66	0.71	0.0353553	19.91	1.05	2.42	1.46	4.88
IL-6	0.9	0.76	0.83	0.0494975	0.49	0.46	0.475	0.0106066	0.7	0.51	1.03	1	1.015	0.0106066	1.06	1.04	1.05	0.00707107	0.53	0.3	0.52	0.29	1.11
IL-7	10.64	13.87	12.255	1.14198	9.26	10.14	9.7	0.311127	4.28	0.71	10.41	12.06	11.235	0.583363	2.27	2.42	2.345	0.053033	2.01	6.8	3.95	4.65	1.5
IL-8	13.43	14.16	13.795	0.258094	9.56	9.07	9.315	0.173241	7.63	12.7	8.71	7.69	8.2	0.360624	3.47	3.12	3.295	0.123744	4.18	7.75	4.77	15.75	73.02
IL-9	12.09	11.93	12.01	0.0565685	2.4	3.78	3.09	0.487904	9.2	3.91	8.89	9.78	9.335	0.314663	1.87	1.87	1.87	0	6.18	0.64	10.2	0.64	3.49
IL-10	12.72	13.38	13.05	0.233345	5.42	4.93	5.175	0.173241	1.46	1.74	1.57	1.62	1.595	0.0176777	0.19	0.41	0.3	0.0777817	0.05	1.57	1.74	1.74	0.05
IL-12p40	169.41	155.72	162.565	4.84015	164.28	191.52	177.9	9.63079	159.15	107.18	94.85	88.66	91.755	2.1885	27.56	35.1	31.33	2.66579	38.84	40.7	40.7	43.48	119.41
IL-12p70	5.61	3.66	4.635	0.689429	1.6	0.8	1.2	0.282843	1.28	1.12	1.12	0.65	0.885	0.16617	0.05	0.05	0.05	0	4.08	2.42	1.28	2.58	0.05
IL-13	64.27	63.21	63.74	0.374767	25.27	29.32	27.295	1.43189	23.88	18.81	53.95	57.81	55.88	1.36472	61.07	55.62	58.345	1.92687	61.07	65.33	26.64	45.4	33.21
IL-15	23.59	23.59	23.59	0	5.81	5.59	5.7	0.0777817	42.02	4.85	8.58	9.86	9.22	0.452548	6.45	8.36	7.405	0.675287	11.57	11.89	6.87	9.22	20.79
IL-17A	6.32	6.79	6.555	0.16617	8.77	9.65	9.21	0.311127	53.72	1.98	14.49	15.89	15.19	0.494975	8.77	8.95	8.86	0.0636396	3.54	4.53	2.09	2.51	46.69
IL-17E/IL-25	553.79	492.52	523.155	21.6622	109.29	189.18	149.235	28.2454	207.95	87.52	279.89	297.24	288.565	6.13415	170.01	76.21	123.11	33.1633	244.48	288.59	397.43	140.35	10.21
IL-17F	72.28	67.98	70.13	1.52028	37.33	44.63	40.98	2.58094	20.5	9.17	19.92	17.03	18.475	1.02177	8.76	5.9	7.33	1.01116	5.9	1.54	13.92	2.01	44.63
IL-18	18.49	18.76	18.625	0.0954594	35.87	39.69	37.78	1.35057	29.28	47.73	18.33	22.47	20.4	1.46371	12.36	12.21	12.285	0.053033	15.9	28.16	18.88	28.88	25.94
IL-22	28.22	32.39	30.305	1.47432	38.87	34.67	36.77	1.48492	2.56	2.56	14.27	31.6	22.935	6.12708	74.65	68.27	71.46	2.25567	57.18	49.59	63.15	10.35	14.27
IL-27	2152.4	2216.76	2184.58	22.7547	1887.15	2075.24	1981.19	66.4999	1980.7	368.47	661.65	657.64	659.645	1.41775	749.28	711.79	730.535	13.2547	1177.95	954.4	2904.97	994.64	391.78
IP-10	50.97	51.05	51.01	0.0282843	72.26	69.88	71.07	0.841457	29.22	14.88	19.98	21.43	20.705	0.512652	17.78	16.68	17.23	0.388909	11.44	64.09	93.84	42.24	29.75
MCP-1	254.73	246.06	250.395	3.06531	258.18	264.36	261.27	2.18496	256.49	482.14	353.98	349.09	351.535	1.72888	487.84	481.55	484.695	2.22385	216.95	489.77	342.99	468.26	317.32
MCP-3	15.84	16.65	16.245	0.286378	9.11	9.73	9.42	0.219203	7.9	5.58	14.12	15.74	14.93	0.572756	14.12	12.84	13.48	0.452548	15.53	16.65	10.18	14.12	11.44
M-CSF	106.97	111.51	109.24	1.60513	48.95	45.68	47.315	1.15612	57.72	414.12	308.13	298.57	303.35	3.37997	157.39	141.25	149.32	5.70635	23.15	127.48	51.13	172.46	501.91
MDC	262.04	601.14	431.59	119.89	1367.32	1581.64	1474.48	75.7736	1353.11	1127.43	1994.28	2253.53	2123.91	91.6587	547.78	521.53	534.655	9.28078	601.82	1220.63	1080.16	1265	1407.13
MIG/CXCL9	696	748.94	722.47	18.7171	1398.21	1452.13	1425.17	19.0636	946.18	3928.08	1232.04	1186.07	1209.05	16.2528	741.67	712.85	727.26	10.1894	520.27	1175.9	600.64	1479	1879.29
MIP-1a	47.77	53.67	50.72	2.08597	23.38	29.6	26.49	2.1991	83.11	24.62	42.32	42.32	42.32	0	22.11	16.02	19.065	2.15314	25.81	17.04	25.42	13.87	11.5
MIP-1b	15.22	17.3	16.26	0.735391	37.63	40.38	39.005	0.972272	37.18	36.36	25.45	26.47	25.96	0.360624	31.8	31.54	31.67	0.0919239	52.68	53.74	49.94	61.7	21.72
PDGF-AA	1870.18	1885.5	1877.84	5.41644	1286.45	1376.66	1331.56	31.8941	1850.75	3127.1	4229.49	4880.48	4554.98	230.16	3833.45	3517.7	3675.57	111.634	1958.75	2644.46	2366.97	2508.56	3822.07
PDGF-AB/BB	22614.7	24417	23515.8	637.213	25538	22045.4	23791.7	1234.81	16582.1	26820.2	35080.9	41271.9	38176.4	2188.85	24888.9	24522.3	24705.6	129.609	24247.8	31518.1	24601.9	30517.8	19799.4
RANTES	1637.13	1816.31	1726.72	63.3497	1584.05	1574.6	1579.32	3.34108	2726.32	49071	3239.1	3309.54	3274.32	24.9043	15938	3013.32	9475.64	4569.55	4887.82	2024.23	2356.07	1748.99	2304.8
TGFa	18.02	19.56	18.79	0.544472	19.5	19.17	19.335	0.116673	8.31	12.12	6.32	6.37	6.345	0.0176777	7.74	7.31	7.525	0.152028	4.34	5.28	5.09	4.62	24.67
TNFa	52.68	50.27	51.475	0.852064	36.93	44.24	40.585	2.58448	26.43	18.24	50.87	55.67	53.27	1.69706	11.15	8.51	9.83	0.933381	40.59	30.78	33.86	22.67	33.86
TNFb	6.18	9.36	7.77	1.1243	18.59	17.26	17.925	0.470226	2.62	5.32	8.13	9.07	8.6	0.33234	17.41	16.23	16.82	0.417193	17.56	7.41	2.48	5.03	9.36
VEGF-A	214.49	231.12	222.805	5.87959	104.63	120.26	112.445	5.52604	55.19	173.46	189.65	206.77	198.21	6.05283	326.69	292.22	309.455	12.187	537.52	181.5	26.78	147.45	425.43
ACTH	14.65	14.46	14.555	0.0671751	0.37	0.37	0.37	0	0.37	0.37	0.37	0.37	0.37	0	0.37	0.37	0.37	0	0.37	0.37	0.37	0.37	0.37
DKK1	1445.7	1605.73	1525.72	56.5791	1548.5	1740.7	1644.6	67.953	1259.54	1160.86	1525.11	1501.33	1513.22	8.4075	1613.27	1641.31	1627.29	9.91364	995.55	1499.99	1192.52	1759.42	1234.8
FGF-23	94.36	94.06	94.21	0.106066	55.27	52.02	53.645	1.14905	32.45	9.16	23.94	25.88	24.91	0.685894	9.16	9.16	9.16	0	9.16	9.16	9.16	9.16	9.16
IL-1B	1.72	2.4	2.06	0.240416	0.86	0.66	0.76	0.0707107	0.86	0.73	1.37	1.27	1.32	0.0353553	0.83	0.86	0.845	0.0106066	0.8	0.53	0.46	0.59	0.9
IL-6	10.56	11.16	10.86	0.212132	1.74	1.96	1.85	0.0777817	1.85	0.96	1.62	1.96	1.79	0.120208	1.79	2.41	2.1	0.219203	2.75	0.35	0.85	0.41	0.63
Insulin	2617.69	2747.44	2682.57	45.8736	537.98	390.34	464.16	52.1986	782.88	171.95	147.61	15.26	81.435	46.7928	372.72	195.07	283.895	62.8088	642.97	4885.97	522.38	989.53	15.26
Leptin	1729.07	1655.52	1692.3	26.0039	584.86	573.94	579.4	3.8608	573.94	236.47	1496.64	1439.67	1468.16	20.1419	3784.22	3798.85	3791.53	5.17249	5226.69	24754	10292.6	24531.5	259.49
Osteocalcin	13866.9	14080.3	13973.6	75.4342	15028.5	13654.3	14341.4	485.846	12331.8	15202.6	18971	18667.8	18819.4	107.201	3886.98	3370.93	3628.95	182.451	4025.14	4908.09	7446.48	7191.82	20804.9
Osteopontin	18986.9	19385.4	19186.1	140.909	18944.8	18781.2	18863	57.8343	15902.7	3593.75	8791.85	9371.32	9081.58	204.874	5076.34	5163.25	5119.8	30.7273	5233.49	6385.41	12454	4520.24	2775.91
Osteoprotegerin	239.66	231.44	235.55	2.90621	257.98	240.83	249.405	6.06344	271.57	158.4	247.47	251.36	249.415	1.37532	249.42	247.47	248.445	0.689429	188.32	425.66	308.25	386.43	301.71
PTH	101.97	101.27	101.62	0.247487	40.18	37.21	38.695	1.05005	19.75	0.04	11.8	12.17	11.985	0.130815	5.09	5.47	5.28	0.13435	41.57	71.41	33.54	75.92	3.15
SOST	3134.62	3290.51	3212.57	55.1154	2319.47	2381.72	2350.59	22.0087	1248.71	1224.03	1495.84	1546.74	1521.29	17.9959	1167.23	1167.23	1167.23	0	1645.29	1245.64	1575.69	1871.33	738.76
TNFa	1.68	1.43	1.555	0.0883883	1.76	1.69	1.725	0.0247487	1.94	1.1	0.77	0.62	0.695	0.053033	0.56	0.59	0.575	0.0106066	0.63	0.71	1.63	0.73	1.85
